# Supplementary material
Source: publisher figshare collection journal article supplement (https://tandf.figshare.com/ndownloader/files/15657830)
Supplement: Supplementary file 1 [file 15657830]

Adsorptive Removal of Alizarin Dye from Wastewater Using Maghemite Nanoadsorbents

Ismail Badran1*, Rawan Khalaf1

1 Department of Chemistry, An-Najah National University P.O. Box 7, Nablus, Palestine
* Corresponding Author: Ismail Badran, Tel.: +970 59 814 2621
E-mail: [i.badran@najah.edu](mailto:i.badran@najah.edu)

# **Supplementary Information**

Figure S1: Calibration curve for ALZ standard solution at pH=11 obtained by UV-VIS spectrophotometer at λmax = 498 nm. 25°C.

Figure S2: FTIR spectra for ALZ adsorption onto NP’s: (a) pure NP’s, (b)ALZ (c)ALZ- adsorbed on NP’s.
